# Supplementary material for: JAK2 Exon 14 Skipping in Patients with Primary Myelofibrosis: A Minor Splice Variant Modulated by the JAK2-V617F Allele Burden
Source: PubMed Central journal article supplement (PMC4305294; doi:10.1371/journal.pone.0116636), 2015-01-24
Supplement: pone.0116636.s006.pdf [file pone.0116636.s006.pdf]

**Table S1.** RNA quality control assay results for seven randomly chosen cDNA samples used in this study.

| Sample          | 5'/3' ratio-mRNA integrity assay <sup>A</sup> |                       |                       | DNA contamination control assay <sup>B</sup> | Positive PCR control assay <sup>C</sup> |
|-----------------|-----------------------------------------------|-----------------------|-----------------------|----------------------------------------------|-----------------------------------------|
|                 | Cq (RQ1) <sup>D</sup>                         | Cq (RQ2) <sup>D</sup> | $\Delta$ Cq (RQ2-RQ1) | Cq (gDNA) <sup>D</sup>                       | Cq (PCR) <sup>D</sup>                   |
| Control 1       | 15.03                                         | 14.52                 | - 0.51                | No amplification                             | 22.98                                   |
| Control 2       | 15.03                                         | 15.20                 | 0.17                  | No amplification                             | 23.08                                   |
| Patient 1       | 16.02                                         | 15.85                 | - 0.17                | No amplification                             | 22.91                                   |
| Patient 2       | 15.74                                         | 15.91                 | 0.17                  | 35.17                                        | 23.16                                   |
| Patient 3       | 14.75                                         | 14.26                 | -0.49                 | No amplification                             | 22.89                                   |
| Patient 4       | 15.01                                         | 14.52                 | -0.49                 | No amplification                             | 22.82                                   |
| UKE-1 cell line | 18,29                                         | 17,49                 | -0.80                 | No amplification                             | 22.92                                   |

<sup>A</sup> According to manufacturer instructions (Bio-Rad), if  $\Delta$ Cq (RQ2-RQ1) is minor than 3, mRNA degradation is minimal and will likely have little to no effect on gene expression results.

<sup>B</sup> Cq>35 (threshold 300 Relative Fluorescence Units (RFU)) indicates single copy detection to no gDNA present.

<sup>C</sup> Cq>30 (threshold 300 RFU) indicates poor PCR performance due to the presence of inhibitors in RNA samples.

<sup>D</sup> Threshold = 300 RFU.
