# Supplementary material for: JAK2 Exon 14 Skipping in Patients with Primary Myelofibrosis: A Minor Splice Variant Modulated by the JAK2-V617F Allele Burden
Source: PubMed Central journal article supplement (PMC4305294; doi:10.1371/journal.pone.0116636), 2015-01-24
Supplement: pone.0116636.s007.pdf [file pone.0116636.s007.pdf]

**Table S2.** Primers used in RT-qPCR experiments.

| <b>Amplicon name</b> | <b>GenBank accession number</b> | <b>Amplicon: length</b> | <b>Primer 5' position (exon)</b> | <b>Primer sequence</b>    |
|----------------------|---------------------------------|-------------------------|----------------------------------|---------------------------|
| PCR-JAK2 $\Delta$ 14 | N.A.                            | 130 bp                  | 2250 (13-15 junction)            | GCACACAGAAACTATTCAGAGAT   |
|                      |                                 |                         | 2467 (15)                        | GCCAACTGTTTAGCAACTTCA     |
| PCR-JAK2+14          | NM_004972.3                     | 191 bp                  | 2277 (14)                        | TTTGAAGCAGCAAGTATGATGAGC  |
|                      |                                 |                         | 2467 (15)                        | GCCAACTGTTTAGCAACTTCA     |
| YWHAZ[1]             | NM_003406.3                     | 94 bp                   | 1145 (6)                         | ACTTTTGGTACATTGTGGCTTCAA  |
|                      |                                 |                         | 1238 (6)                         | CCGCCAGGACAAACCAAGTAT     |
| GAPDH                | NM_002046.3                     | 130 bp                  | 129 (2-3 junction)               | CGGATTTGGTCGTATTGG        |
|                      |                                 |                         | 258 (4)                          | GGTGAATCATATTGGAACA       |
| HPRT1 [1]            | NM_000194.2                     | 94 bp                   | 578 (6)                          | TGACACTGGCAAAACAATGCA     |
|                      |                                 |                         | 671 (6-7 junction)               | GGTCCTTTTCACCAGCAAGCT     |
| UBC                  | NM_021009.6                     | 158 bp                  | 447 (1-2 junction)               | CGTCACTTGACAATGCAG        |
|                      |                                 |                         | 604 (2)                          | TGTTTTCCAGCAAAGATCAG      |
| SRp55 [2]            | NM_006275.5                     | 165 bp                  | 55 (1)                           | CCCCTGTGGTGTGAGGCGCGTGTTC |
|                      |                                 |                         | 219 (1)                          | CCTTCTCCCGGACGTTGTAGCTCAG |
| Srp55-PTC+[2]        | NR_034009.1                     | 253 bp                  | 412 (2-3 junction)               | GCTACGGAAGCCGCATGACCAATGG |
|                      |                                 |                         | 664 (3)                          | GGCCACAAAACACGCAAGGTAACAG |
| hnRNP-A1             | NM_002136.2                     | 122 bp                  | 544 (4)                          | GCTTTGCCTTTGTAACCTTTGACG  |
|                      |                                 |                         | 665 (5)                          | AGCCATCTCTTGCTTTGACAGGG   |

1. Vandesompele J, De Preter K, Pattyn F, Poppe B, Van Roy N, et al. (2002) Accurate normalization of real-time quantitative RT-PCR data by geometric averaging of multiple internal control genes. *Genome Biol* 3: RESEARCH0034.
2. Lareau LF, Inada M, Green RE, Wengrod JC, Brenner SE (2007) Unproductive splicing of SR genes associated with highly conserved and ultraconserved DNA elements. *Nature* 446: 926–929. doi:10.1038/nature05676
