# Supplementary material for: JAK2 Exon 14 Skipping in Patients with Primary Myelofibrosis: A Minor Splice Variant Modulated by the JAK2-V617F Allele Burden
Source: PubMed Central journal article supplement (PMC4305294; doi:10.1371/journal.pone.0116636), 2015-01-24
Supplement: pone.0116636.s008.pdf [file pone.0116636.s008.pdf]

**Table S3.** Primers used in RT-PCR experiments.

| <b>Amplicon name</b>    | <b>GenBank accession number</b> | <b>Amplicon: length</b> | <b>Primer 5'position (exon)</b> | <b>Primer sequence</b>   |
|-------------------------|---------------------------------|-------------------------|---------------------------------|--------------------------|
| PCR- $\Delta$ ex14/ex18 | N.A.                            | 495 bp                  | 2250 (13-15 junction)           | GCACACAGAAACTATTCAGAGAT  |
|                         |                                 |                         | 2832 (18)                       | ATTCTGCCCACTTTGGTG       |
| PCR-ex14/ex18           | NM_004972.3                     | 556 bp                  | 2277 (14)                       | TTTGAAGCAGCAAGTATGATGAGC |
|                         |                                 |                         | 2832 (18)                       | ATTCTGCCCACTTTGGTG       |
