# Supplementary material for: JAK2 Exon 14 Skipping in Patients with Primary Myelofibrosis: A Minor Splice Variant Modulated by the JAK2-V617F Allele Burden
Source: PubMed Central journal article supplement (PMC4305294; doi:10.1371/journal.pone.0116636), 2015-01-24
Supplement: pone.0116636.s009.pdf [file pone.0116636.s009.pdf]

**Table S4.** Identification of potential splicing regulatory sequences in wild type and V617F mutated *JAK2* exon 14 sequences. Twelve different matrices implemented in Human Splicing Finder (HSF) 3.0, are presented.

| Matrice                                 | Type of exonic element           | Position in exon 14 sequence<br>(88 nucleotides) | Sequence motif (WT)                                                                                          | Sequence motif (mutant)                                                                                    | Variation            |
|-----------------------------------------|----------------------------------|--------------------------------------------------|--------------------------------------------------------------------------------------------------------------|------------------------------------------------------------------------------------------------------------|----------------------|
| 1) ESE finder                           | ESE                              | 70                                               | TGT <u>G</u> TC<br>(Linked protein: SRp55)                                                                   | TGT <u>I</u> TCTG<br>(Linked protein: SC35)                                                                | Site broken/New site |
| 2) EIEs <sup>a</sup> [3]                | ESE                              | 68                                               | TATG <u>TG</u>                                                                                               | -                                                                                                          | Site broken          |
| 3) ESR <sub>s</sub> <sup>b</sup> [4]    | ESE/ESS                          | 70                                               | TGT <u>G</u> TC                                                                                              | -                                                                                                          | Site broken          |
| 4) RESCUE-ESE <sup>c</sup> hexamers [5] | ESE                              | -                                                | -                                                                                                            | -                                                                                                          | No difference        |
| 5) Enhancers motifs <sup>d</sup> [6]    | ESE                              | -                                                | -                                                                                                            | -                                                                                                          | No difference        |
| 6) PESE <sup>e</sup> octamers [7]       | ESE                              | -                                                | -                                                                                                            | -                                                                                                          | No difference        |
| 7) FAS-ESS hexamers <sup>f</sup> [8]    | ESS                              | 70<br>71<br>73                                   | -                                                                                                            | TG <u>I</u> TC/<br>GT <u>I</u> TCT/<br>I <u>T</u> CTGT                                                     | New site             |
| 8) FAS-ESS decamers <sup>f</sup> [8]    | ESS                              | -                                                | -                                                                                                            | -                                                                                                          | No difference        |
| 9) PESS <sup>g</sup> octamers [7]       | ESS                              | 71                                               | -                                                                                                            | GT <u>I</u> TCTGT                                                                                          | New site             |
| 10) IIEs <sup>h</sup> [3]               | ESS                              | 68<br>69<br>70<br>71<br>72<br>73                 | TATG <u>TG</u><br>ATG <u>TG</u> T<br>TGT <u>G</u> TC<br>GT <u>G</u> TCT<br>T <u>G</u> TCTG<br><u>G</u> TCTGT | TATG <u>I</u><br>ATG <u>I</u> T<br>TG <u>I</u> TC<br>GT <u>I</u> TCT<br>T <u>I</u> TCTG<br>I <u>T</u> CTGT | No difference        |
| 11) hnRNP motifs <sup>i</sup> [6]       | ESS<br>(Linked factor: hnRNP-A1) | 68                                               | TATG <u>TG</u><br>(score: 66.19%)                                                                            | TATG <u>I</u><br>(score: 68.10%)                                                                           | Variation: 2.88%     |
| 12) Silencer motifs (Sironi et al.) [9] | ESS                              | -                                                | -                                                                                                            | -                                                                                                          | No difference        |

- <sup>a</sup> Exon Identity Elements;
- <sup>b</sup> Exonic Splicing Regulatory Sequences (ESE or ESS depending on exonic position);
- <sup>c</sup> Hybrid computational/experimental method;
- <sup>d</sup> Human Splice Finder matrice based on experimental data;
- <sup>e</sup> Predicted Exonic Splicing Enhancers;
- <sup>f</sup> Fluorescence-Activated Screen for Exonic Splicing Silencers;
- <sup>g</sup> Predicted Exonic Splicing Silencers;
- <sup>h</sup> Intron Identity Elements;
- <sup>i</sup> Human Splice Finder matrice based on experimental data (hnRNP-A1 threshold: 65.476%).

## REFERENCES

1. Vandesompele J, Preter KD, Pattyn F, Poppe B, Roy NV, et al. (2002) Accurate normalization of real-time quantitative RT-PCR data by geometric averaging of multiple internal control genes. *Genome Biol* 3: research0034.1.
2. Lareau LF, Inada M, Green RE, Wengrod JC, Brenner SE (2007) Unproductive splicing of SR genes associated with highly conserved and ultraconserved DNA elements. *Nature* 446: 926–929. doi:10.1038/nature05676
3. Zhang C, Li W-H, Krainer AR, Zhang MQ (2008) RNA landscape of evolution for optimal exon and intron discrimination. *Proc Natl Acad Sci USA* 105: 5797–5802. doi:10.1073/pnas.0801692105
4. Goren A, Ram O, Amit M, Keren H, Lev-Maor G, et al. (2006) Comparative analysis identifies exonic splicing regulatory sequences--The complex definition of enhancers and silencers. *Molecular Cell* 22: 769–781. doi:10.1016/j.molcel.2006.05.008
5. Fairbrother WG, Yeh R-F, Sharp PA, Burge CB (2002) Predictive identification of exonic splicing enhancers in human genes. *Science* 297: 1007–1013. doi:10.1126/science.1073774
6. Desmet FO, Hamroun D, Lalande M, Collod-Beroud G, Claustres M, et al. (2009) Human Splicing Finder: an online bioinformatics tool to predict splicing signals. *Nucleic Acids Res* 37: e67–e67. doi:10.1093/nar/gkp215
7. Zhang XH-F, Chasin LA (2004) Computational definition of sequence motifs governing constitutive exon splicing. *Genes Dev.* 18: 1241–1250. doi:10.1101/gad.1195304
8. Wang Z, Rolish ME, Yeo G, Tung V, Mawson M, et al. (2004) Systematic identification and analysis of exonic splicing silencers. *Cell* 119: 831–845. doi:10.1016/j.cell.2004.11.010
9. Sironi M, Menozzi G, Riva L, Cagliani R, Comi GP, et al. (2004) Silencer elements as possible inhibitors of pseudoexon splicing. *Nucleic Acids Res* 32: 1783–1791. doi:10.1093/nar/gkh341
